# Supplementary material
Source: PubMed Central journal article supplement (PMC8256697)
Supplement: NIHMS1714518-supplement-Supplementary_Information.pdf [file NIHMS1714518-supplement-Supplementary_Information.pdf]

## SUPPLEMENTARY INFORMATION

### **Cryo-EM structure of the RNA-guided ribonuclease Cas12g**

Zhuang Li<sup>1,3</sup>, Heng Zhang<sup>1,3</sup>, Renjian Xiao<sup>1,3</sup>, Ruijie Han<sup>1</sup> and Leifu Chang<sup>1,2,\*</sup>

<sup>1</sup>Department of Biological Sciences

<sup>2</sup>Purdue University Center for Cancer Research

Purdue University, 915 W. State Street, West Lafayette, IN 47907.

<sup>3</sup>These authors contributed equally to this work.

\*Correspondence to L.C. ([lchang18@purdue.edu](mailto:lchang18@purdue.edu))

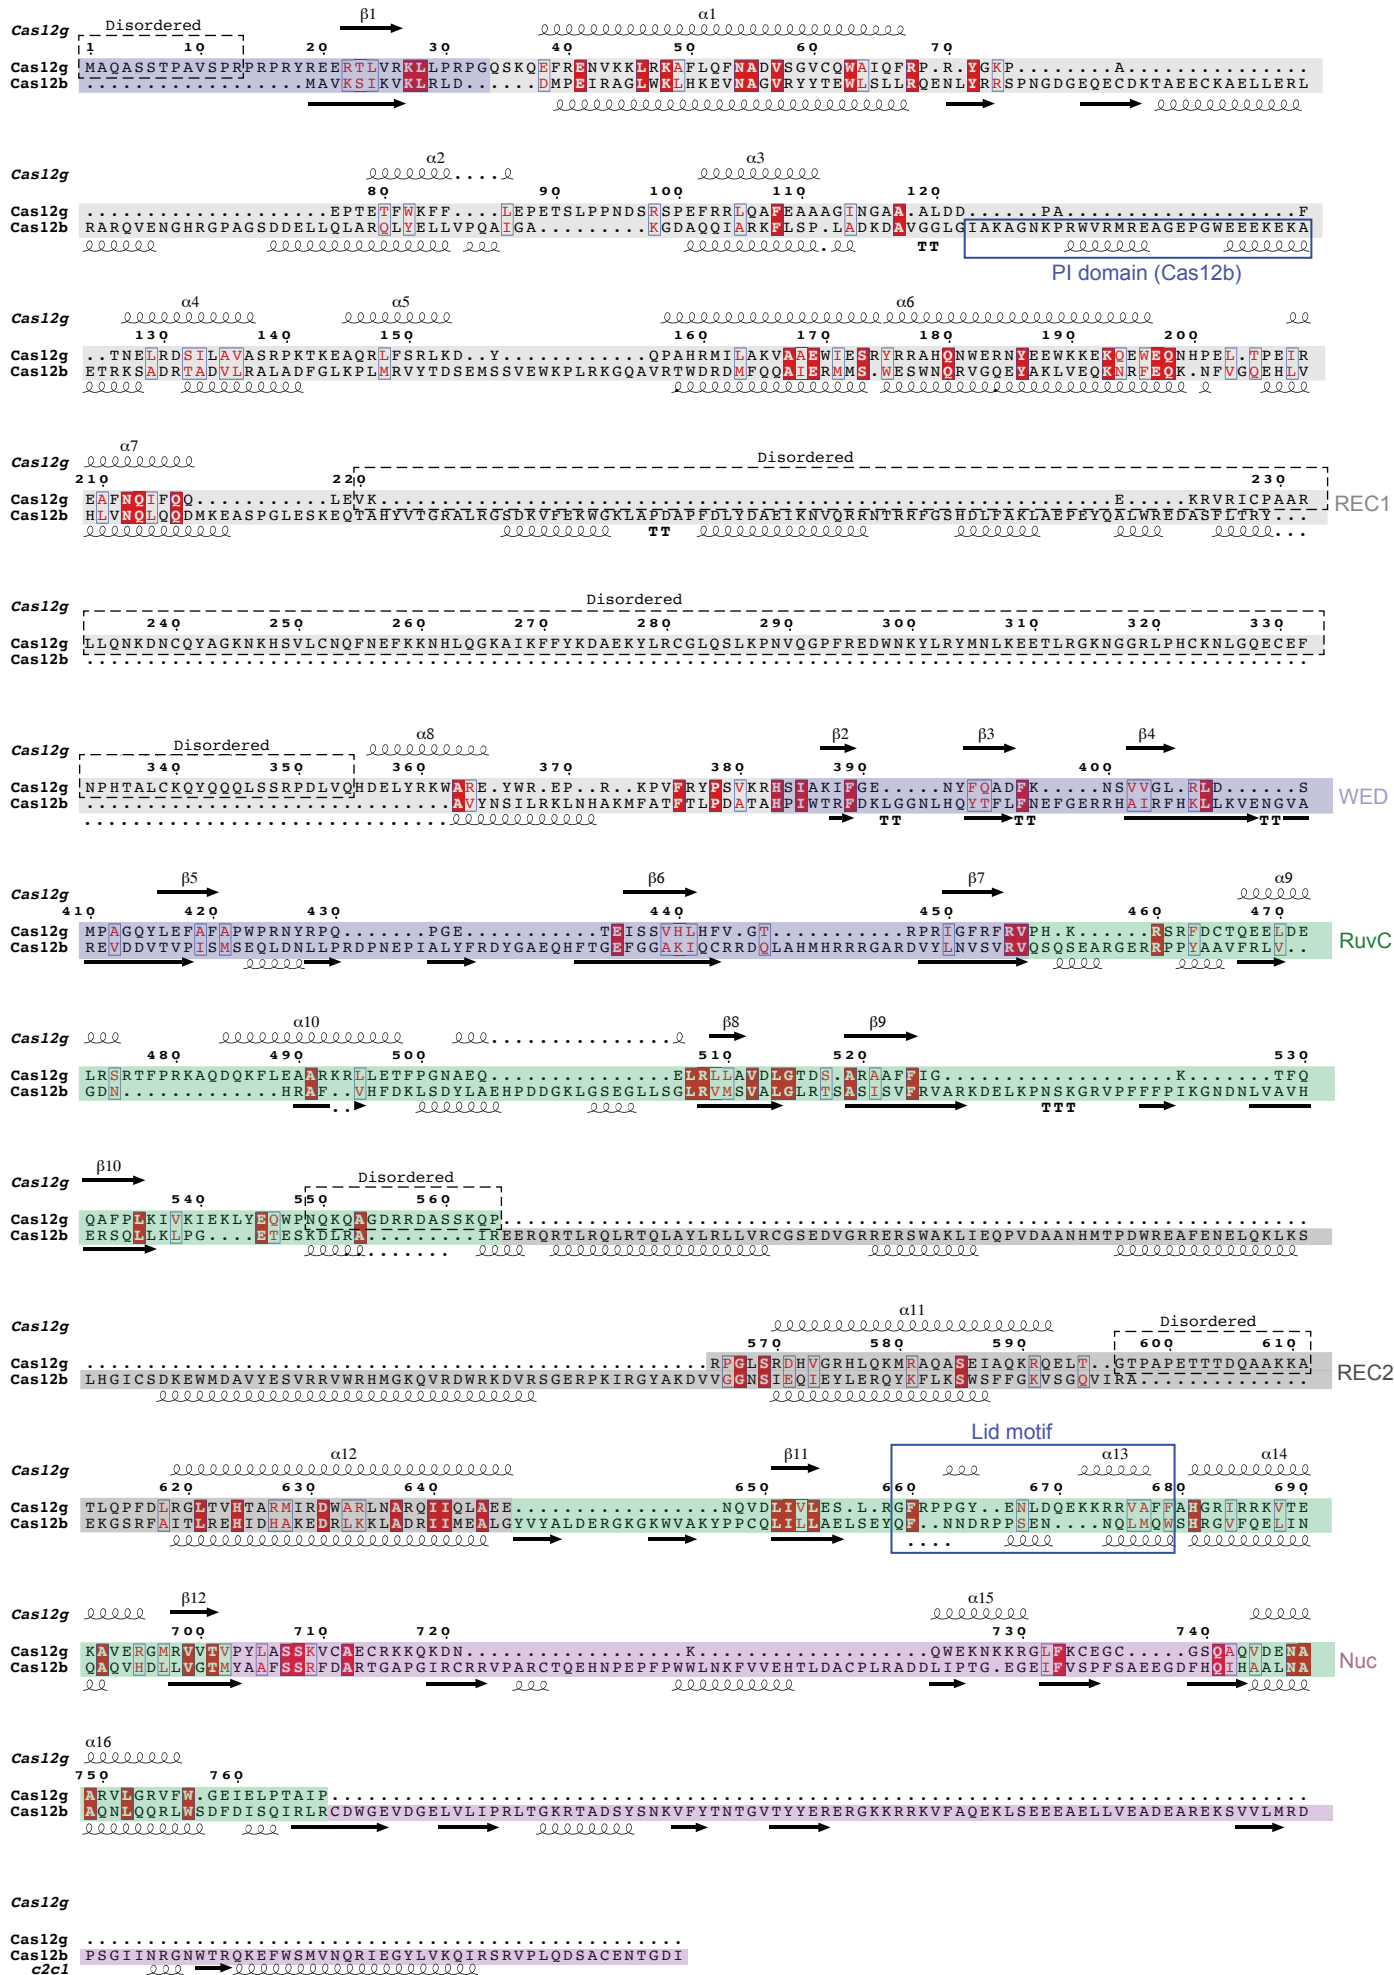

**Supplementary Figure 1. Structure-based sequence alignment between Cas12g and Cas12b.** Domains of Cas12g are indicated by background colors according to domain architecture in **Fig. 1a**. Secondary structures of each domain of Cas12g are labeled. Lid motifs and PI domain (Cas12g) are indicated by blue boxes. Disordered regions of Cas12g are indicated by dashed boxes.

**Supplementary Table 1. Statistics of cryo-EM data and structure refinement.**

|                                                     | Cas12g-sgRNA<br>(EMD-22257, PDB<br>6XMF) | Cas12g(E655A)-<br>sgRNA-RNA<br>(EMD-22258,<br>PDB 6XMG) |
|-----------------------------------------------------|------------------------------------------|---------------------------------------------------------|
| <b>Data collection and processing</b>               |                                          |                                                         |
| Magnification                                       | 81,000                                   | 81,000                                                  |
| Voltage (kV)                                        | 300                                      | 300                                                     |
| Electron exposure (e <sup>-</sup> /Å <sup>2</sup> ) | 54                                       | 54                                                      |
| Defocus range (μm)                                  | 1.5 – 2.5                                | 1.5 – 2.5                                               |
| Pixel size (Å)                                      | 1.05                                     | 1.05                                                    |
| Symmetry imposed                                    | C1                                       | C1                                                      |
| Initial particle images (no.)                       | 6,435,750                                | 462, 268                                                |
| Final particle images (no.)                         | 469,157                                  | 38,238                                                  |
| Map resolution (Å)                                  | 3.0                                      | 4.8                                                     |
| FSC threshold                                       | 0.143                                    | 0.143                                                   |
| Map resolution range (Å)                            | 2.9-5                                    | 4.6-7                                                   |
| <b>Refinement</b>                                   |                                          |                                                         |
| Initial model used                                  | PDB 5U30                                 | PDB 6XMF                                                |
| Model resolution (Å)                                | 3.3                                      | 7.8                                                     |
| FSC threshold                                       | 0.5                                      | 0.5                                                     |
| Model resolution range (Å)                          | 2.9 - 50                                 | 7.6 - 50                                                |
| Map sharpening <i>B</i> factor (Å <sup>2</sup> )    | -82                                      | NA                                                      |
| Model composition                                   |                                          |                                                         |
| Non-hydrogen atoms                                  | 7490                                     | 8263                                                    |
| Protein residues                                    | 627                                      | 638                                                     |
| Ligands                                             | 1                                        | 1                                                       |
| <i>B</i> factors (Å <sup>2</sup> )                  |                                          |                                                         |
| Protein                                             | 38.40                                    | 394.34                                                  |
| Ligand                                              | 79.64                                    | 347.38                                                  |
| R.m.s. deviations                                   |                                          |                                                         |
| Bond lengths (Å)                                    | 0.002                                    | 0.002                                                   |
| Bond angles (°)                                     | 0.548                                    | 0.504                                                   |
| <b>Validation</b>                                   |                                          |                                                         |
| MolProbity score                                    | 1.92                                     | 1.98                                                    |
| Clashscore                                          | 8.93                                     | 10.79                                                   |
| Poor rotamers (%)                                   | 0.00                                     | 0.00                                                    |
| Ramachandran plot                                   |                                          |                                                         |
| Favored (%)                                         | 93.17                                    | 93.47                                                   |
| Allowed (%)                                         | 6.83                                     | 6.53                                                    |
| Disallowed (%)                                      | 0.00                                     | 0.00                                                    |

**Supplementary Table 2. Comparison between Cas12g and other Cas12 and Cas13 nucleases.**

|                                              | <b>Cas12g<br/>(PDB:6XMG)</b>                        | <b>Cas12a<br/>(PDB:5XUS)</b>                          | <b>Cas12b<br/>(PDB:5U30)</b>                                 | <b>Cas12e<br/>(PDB:6NY2)</b>                             | <b>Cas12i<br/>(PDB:6W5C)</b> | <b>Cas13a<br/>(PDB:5XWP)</b>                 |
|----------------------------------------------|-----------------------------------------------------|-------------------------------------------------------|--------------------------------------------------------------|----------------------------------------------------------|------------------------------|----------------------------------------------|
| <b>Classification</b>                        | Class 2,<br>type V                                  | Class 2,<br>type V                                    | Class 2,<br>type V                                           | Class 2,<br>type V                                       | Class 2,<br>type V           | Class 2,<br>type VI                          |
| <b>Protein<br/>length (aa)</b>               | 767                                                 | 1228<br>( <i>Lachnospira<br/>ceae<br/>bacterium</i> ) | 1129<br>( <i>Alicyclobacillus<br/>acidoterrestri<br/>s</i> ) | 986<br>( <i>Deltaproteo<br/>bacteria<br/>bacterium</i> ) | 1093                         | 1159<br>( <i>Leptotrichia<br/>buccalis</i> ) |
| <b>tracrRNA</b>                              | Yes                                                 | No                                                    | Yes                                                          | Yes                                                      | No                           | No                                           |
| <b>Target type</b>                           | ssRNA                                               | DNA                                                   | DNA                                                          | DNA                                                      | DNA                          | ssRNA                                        |
| <b>Collateral<br/>cleavage<br/>activity</b>  | ssRNA,<br>ssDNA                                     | ssDNA                                                 | ssDNA                                                        | ssDNA                                                    | ssDNA                        | ssRNA                                        |
| <b>Pre-crRNA<br/>processing<br/>activity</b> | No                                                  | Yes                                                   | No                                                           | No                                                       | Yes                          | Yes                                          |
| <b>Enzymatic<br/>domain</b>                  | RuvC                                                | RuvC                                                  | RuvC                                                         | RuvC                                                     | RuvC                         | HEPN                                         |
| <b>PI domain</b>                             | No                                                  | Yes                                                   | Yes                                                          | Yes                                                      | Yes                          | No                                           |
| <b>Zinc finger<br/>motif</b>                 | Yes                                                 | No                                                    | No                                                           | Yes                                                      | No                           | No                                           |
| <b>REC1 domain</b>                           | Partially<br>flexible<br>(REC1 <sup>220-354</sup> ) | Rigid                                                 | Rigid                                                        | Rigid                                                    | Rigid                        | -                                            |
| <b>crRNA seed<br/>sequence</b>               | Not reported                                        | PAM-<br>adjacent 5-nt                                 | PAM<br>adjacent 5-nt                                         | Not reported                                             | PAM-<br>adjacent 7-nt        | Central seed                                 |
| <b>crRNA-target<br/>duplex length</b>        | 24 bp                                               | 20 bp                                                 | 20 bp                                                        | 20 bp                                                    | 26-28 bp                     | 28 bp                                        |
| <b>References</b>                            | This study, <sup>20</sup>                           | 28,31-39                                              | 40-42                                                        | 24                                                       | 43                           | 44                                           |
